# Supplementary material
Source: PubMed Central journal article supplement (PMC2660768)
Supplement: 0806514106_0806514106SI.pdf [file 0806514106_0806514106SI.pdf]

# Supporting Information

Salvesen et al. 10.1073/pnas.0806514106

## SI Methods

### Selecting Gene Subsets with Good Combined Discriminatory Power.

As our objective function to minimize for determination of maximal predictive power, we used the sum of squared residuals between the relative probability of the correct class label and that given by a diagonal linear discriminant analysis (DLDA) classifier. The relative probability given by a DLDA classifier is the probability density for the correct class divided by the sum of probability densities over both classes. Ideally a classifier assigns a relative probability of 1 to the correct class label in all cases, but in practice classifiers often do not perform this well.

We then tested increasing numbers of genes using a forward feature subset selection method (1) and found a 29-gene predictor gave the best results. These genes therefore were included in a gene set for validation with QRT-PCR.

**Immunohistochemical Staining.** Five- $\mu\text{m}$  tissue microarray sections of paraffin-embedded tissue were stained as previously reported (2), using antigen retrieval for 10 min at 750 W and for 15 min at 350 W in citrate buffer (pH = 6). Slides were incubated 1 h at room temperature with polyclonal STMN1 antibody (#3352, Cell Signaling) diluted 1:50. A staining index was calculated as

the product of staining intensity (0–3) and area of positive tumor cells (1 = < 10%, 2 = 10%–50%, 3 = > 50%). Values in the upper quartile (which corresponded to indices of 6 and 9) were considered positive.

**SI Text Note 1.** The association between 3q26.32 amplification and tumor recurrence suggests a causal relationship, with its functional effects leading to the aggressive phenotype. An alternative model would be that both 3q26.23 amplification and the aggressive phenotype are caused by a prior event, such as generalized aneuploidy in the cell, leading to an association but no direct causal link. Although this possibility cannot be ruled out, when we measured aneuploidy in 59 of the tumors with SNP array data, we did find that 3q26.32 amplification remains significantly associated with recurrence-free survival after adjustment for the impact of ploidy ( $P = 0.03$ ). Amplification of 3q26.32 therefore seems to have an association with poor survival independent of the overall level of copy-number changes in the cell.

Ploidy was determined from DNA histograms based on measurement of  $10^4$ – $10^5$  cells by flow cytometry as previously described (3), using fresh tumors and adjacent hematoxylin eosin (HE) sections to confirm malignant histology.

1. Bo T, Jonassen I (2002) New feature subset selection procedures for classification of expression profiles. *Genome Biology* 3:1-0017.11.
2. Engelsen IB, et al. (2008) Low BMI-1 expression is associated with an activated BMI-1-driven signature, vascular invasion, and hormone receptor loss in endometrial carcinoma. *Br J Cancer* 98:1662–1669.

3. Salvesen HB, Iversen OE, Akslen LA (1998) Identification of high-risk patients by assessment of nuclear Ki-67 expression in a prospective study of endometrial carcinomas. *Clin Cancer Res* 4:2779–2785.



**a** Genes most over- and under-expressed in 3q26.32 amplified compared to unamplified samples\*

| Overexpressed |           |           | Underexpressed |              |           |
|---------------|-----------|-----------|----------------|--------------|-----------|
| NCBP2         | I_1110064 | SUV39H2   | KLK11          | GALNT7       | TGIF      |
| HPN           | TAF4      | PRKR      | PIG3           | RPL7A        | FLJ13119  |
| CCNE1         | TRC8      | AK3       | KIAA0776       | NOL3         | GOLPH2    |
| ACVR2B        | MRPS23    | ASNA1     | ANXA5          | EIF3S6IP     | CPR8      |
| DDEF1         | GGA3      | LOC135763 | ALDH2          | USP8         | I_1100588 |
| UBE2C         | I_930381  | IFIT1     | ZNF143         | NEIL1        | FLJ20343  |
| PCL1          | OASL      | AK2       | AES            | AGR2         | FLJ20136  |
| UBL4          | WBP11     | PTD011    | TRAF5          | TSPAN-5      | I_959144  |
| NMU           | PLAGL2    | GTF2E1    | I_1109401      | SDR1         | SPRY2     |
| I_1100438     | MGC15397  | Apg4B     | LOC51103       | ITGA6        | I_1100131 |
| MX1           | I_1100479 | IFI27     | SLC1A1         | I_959279     | CRYZ      |
| LOC55831      | PRRG1     | ZNF148    | SLC6A14        | ARL4         | HIRIP5    |
| EHHADH        | FLJ12960  | LOC90355  | SPINK5         | TOM1L1       | TCN1      |
| OPTN          | MGC14595  | PARL      | FLJ21868       | ABCC3        | SAT       |
| TTK           | UBE2E1    | SLC2A4RG  | HRY            | DKFZp547O146 | FLJ21439  |
| I_961605      | FLJ10511  | C20orf1   | FKSG2          | IQGAP1       | FLJ14950  |
| FLJ14751      | OAS3      |           | TANK           | FLJ21817     |           |

**b**

| Rank | Name of compound | Known target       | N  | p-value* |
|------|------------------|--------------------|----|----------|
| 1    | LY-294002        | PI3-Kinase         | 17 | 0.003    |
| 2    | Colforsin        | adenylate cyclases | 2  | 0.005    |
| 3    | 17-AG†           | Hsp90              | 18 | 0.01     |
| 4    | 5224221          |                    | 2  | 0.01     |
| 5    | Resveratrol      |                    | 5  | 0.02     |
| 6    | Sirolimus        | mTOR               | 10 | 0.04     |
| 7    | carbamazepine    | Sodium channel     | 3  | 0.05     |

N=number of active instances; \*see methods; †17-allylamino-geldanamycin

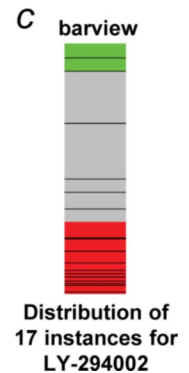

**Fig. S2.** The signatures of 3q26 amplification and a PI3K inhibitor are associated. (A) Genes with the highest (most overexpressed) and lowest (most underexpressed) *t* test statistic in the comparison between 3q26.32 amplified and unamplified samples. (B) Comparison of global expression patterns using the Connectivity Map (1) identifies the PI3K inhibitor LY-294002 as the most significantly anticorrelated with the 3q26 amplification signature among the 164 small molecules tested. Each of the N instances in which the small molecule was tested in the Connectivity Map was scored according to this signature. The p-value for each small molecule represents the distribution of these scores compared with the distribution of scores among all small molecules, using a permutation test as described by Lamb and colleagues (1). (C) The rankings of the 3q26 amplification signature scores for the 17 instances of LY-294002 are displayed as black bars. Rankings within the green and red regions represent scores that are respectively aligned with and divergent from the 3q26 amplification signature.

1. Lamb J, et al. (2006) The Connectivity Map: Using gene-expression signatures to connect small molecules, genes, and disease. *Science* 313:1929–1935.



**a** Connectivity Map results of comparison between Cluster 2 and Cluster 1 samples

| Rank | Name of compound          | Known target       | N  | p-value* |
|------|---------------------------|--------------------|----|----------|
| 1    | 4,5-dianilinophthalimide  | EGFR               | 2  | 0.001    |
| 2    | Sirolimus                 | mTOR               | 10 | 0.006    |
| 3    | LY-294002                 | PI3-Kinase         | 17 | 0.02     |
| 4    | Prochlorperazine          | Dopamine receptors | 3  | 0.02     |
| 5    | Nordihydroguaiaretic acid |                    | 5  | 0.04     |

N=number of active instances  
\*see methods

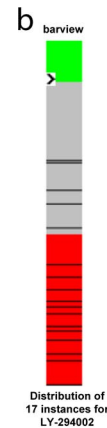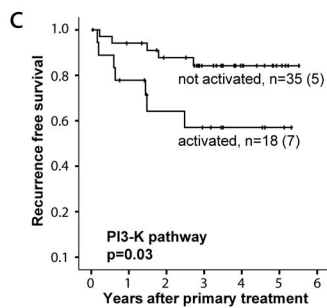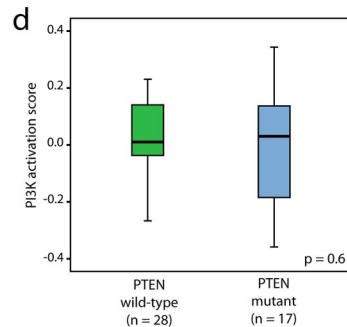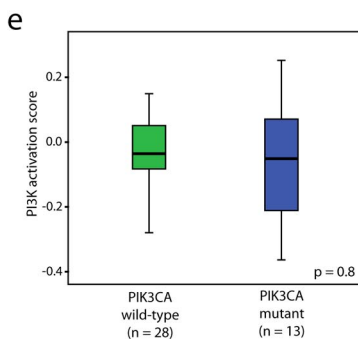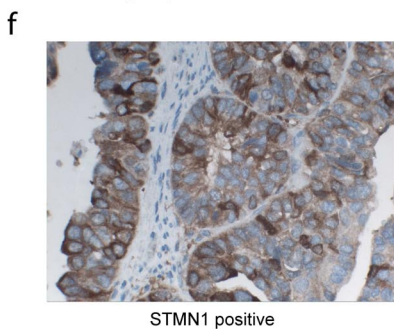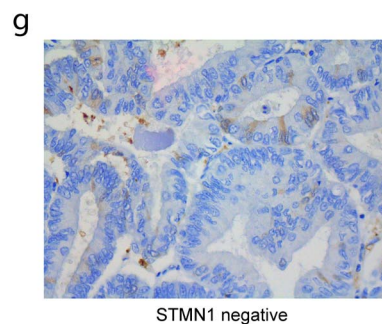

**Fig. S4.** Association between measures of PI3K activation and genomic and proteomic features of endometrial cancer. (A) The Connectivity Map (1) showed that the anticorrelation between the Cluster 2 expression signature and the PI3K inhibitor LY-294002 was the third strongest among the 164 small molecules tested. (B) The rankings of the Cluster 2 signature scores for the individual instances of LY-294002 in the Connectivity Map are displayed as in Fig. S2C. (C) PI3K scores, an alternative measure of PI3K pathway activation, are significantly associated with decreased recurrence-free survival. (D) PI3K scores are not significantly associated with *PTEN* mutations or with (E) *PIK3CA* mutations. P-values were calculated using a 2-sided Wilcoxon test. (F) High expression of the PI3K pathway member STMN1, seen by immunohistochemistry in a tumor with amplification of *PIK3CA* and elevated expression of *PIK3CA* and the PI3K activation signature. (G) Low expression of STMN1, seen in a tumor without amplification of *PIK3CA* or elevated expression of *PIK3CA* or the PI3K activation signature.

1. Lamb J, et al. (2006) The Connectivity Map: Using gene-expression signatures to connect small molecules, genes, and disease. *Science* 313:1929–1935.

**Table S1. Patient characteristics and histopathologic variables for the endometrial carcinoma series studied compared with a population-based patient series from the same region**

| Characteristic             | General Population (n = 285)  | Expression Arrays (n = 57)    |          | SNP Arrays (n = 74)     |          |
|----------------------------|-------------------------------|-------------------------------|----------|-------------------------|----------|
|                            |                               | Raw value                     | P-value* | Raw value               | P-value* |
| Median age                 | 65 years (range, 33–92 years) | 63 years (range, 39–91 years) | 0.8      | 64 years (range, 39–91) | 0.8      |
| FIGO stage III or IV       | 55 (19%)                      | 9 (16%)                       | 0.7      | 12 (16%)                | 0.7      |
| Non-endometrioid histology | 29 (10%)                      | 6 (11%)                       | 1        | 8 (11%)                 | 0.8      |
| Histologic grade 3         | 59 (21%)                      | 13 (23%)                      | 0.7      | 15 (21%)                | 1        |

\*Compared to general population, using a Fisher's exact test, except for age comparisons in which a Kruskal-Wallis test was used

**Table S2. Differences in clinical and histopathologic characteristics between expression clusters I and II and summarized gene mRNA predictor in microarray and qPCR datasets**

| Characteristic                   | Cluster 1 (n = 29) | Cluster 2 (n = 28) | P-value* | Microarray P-value* | qPCR P-value* |
|----------------------------------|--------------------|--------------------|----------|---------------------|---------------|
| Median age                       | 62 years           | 67 years           | 0.6      |                     |               |
| FIGO stage III or IV             | 1 (3%)             | 8 (29%)            | 0.01     | 0.02                | 0.01          |
| Non-endometrioid histology       | 0 (0%)             | 6 (21%)            | 0.01     | 0.03                | 0.003         |
| Histologic grade 3               | 1 (3%)             | 12 (43%)           | < 0.001  | 0.001               | 0.001         |
| Depth of myometrial infiltration | 6 <sup>†</sup>     | 8.5 <sup>†</sup>   | 0.06     | n.s.                | 0.05          |
| Mitotic figures                  | 4 <sup>‡</sup>     | 10 <sup>‡</sup>    | 0.002    | 0.002               | 0.01          |
| Loss of estrogen receptor        | 4 (14%)            | 12 (43%)           | 0.02     | n.s.                | 0.01          |
| Loss of progesterone receptor    | 2 (7%)             | 11 (39%)           | 0.005    | n.s.                | 0.002         |
| Presence of necrosis             | 13 (45%)           | 22 (76%)           | 0.01     | 0.03                | 0.002         |
| Vascular invasion                | 6 (27%)            | 16 (73%)           | 0.007    | 0.02                | 0.002         |
| Type II tumor <sup>§</sup>       | 1 (3%)             | 16 (57%)           | < 0.001  | < 0.001             | < 0.001       |
| Aggressive cluster 2             |                    |                    |          | < 0.001             | < 0.001       |

\*Using a Fisher's exact test except for comparisons between continuous variables, in which a Mann-Whitney U test was used.

<sup>†</sup>Median value in millimeters.

<sup>‡</sup>Median number of mitotic figures per 10 fields at original magnification  $\times$  40.

<sup>§</sup>Defined as non-endometrioid, high-grade endometrioid, or lacking both estrogen receptor and progesterone receptor.

N.s., not significant.

**Table S3. Univariate (UV) and multivariate survival analysis of recurrence-free survival among 53 endometrial cancer patients cured by surgery and adjusted hazard ratios (HRs) for recurrence among endometrial carcinomas for cluster 2 and histopathologic variables**

| Histopathologic Variable      | Univariate Survival | Hazard Ratio           | P-value <sup>‡</sup> | Hazard Ratio                          | P-value <sup>‡</sup> |
|-------------------------------|---------------------|------------------------|----------------------|---------------------------------------|----------------------|
|                               | P-value*            | Cluster 2 <sup>†</sup> |                      | Histopathologic Variable <sup>§</sup> |                      |
| FIGO stage III or IV          | n.s.                | 3.0 (0.9–10.4)         | 0.08                 | 1.3 (0.3–6.3)                         | 0.7                  |
| Non-endometrioid histology    | 0.17                | 2.9 (0.8–10.2)         | 0.1                  | 1.6 (0.3–7.9)                         | 0.6                  |
| Histologic grade 3            | 0.009               | 2.0 (0.5–8.2)          | 0.3                  | 2.9 (0.8–10.8)                        | 0.1                  |
| Loss of estrogen receptor     | n.s.                | 3.2 (0.9–11.2)         | 0.07                 | 1.0 (0.3–3.3)                         | 0.9                  |
| Loss of progesterone receptor | 0.14                | 2.7 (0.7–10.2)         | 0.1                  | 1.5 (0.4–5.6)                         | 0.6                  |

\*Log rank test.

<sup>†</sup>Hazard ratio for cluster 2, adjusted for listed histopathologic variable in column 1; 95% confidence intervals in parentheses.

<sup>‡</sup>Using a log-ratio test.

<sup>§</sup>Hazard ratio for histologic variable in column 1, adjusted for cluster segregation; 95% confidence intervals in parentheses.

N.s., not significant.



**Table S4. List of peak regions of amplification, deletion, and non-overlapping LOH**

| Amplification   | Cytoband | Boundaries of Peak* | Q-value | Frequency <sup>†</sup> (%) | Oncogene or Tumor<br>Suppressor Gene in Region |
|-----------------|----------|---------------------|---------|----------------------------|------------------------------------------------|
| 1               | 1p34.3   | 30.1–41.9           | 2e-3    | 40                         |                                                |
| 2               | 1q42.13  | 224.8–237.7         | 3e-18   | 47                         | <i>LMYC1</i>                                   |
| 3               | 3q26.32  | 173.3–184.9         | 1e-14   | 15                         | <i>PIK3CA</i>                                  |
| 4               | 6p21.2   | 37.5–38.3           | 0.11    | 15                         |                                                |
| 5               | 7p11.2   | 54.5–65.2           | 0.13    | 12                         | <i>EGFR</i>                                    |
| 6               | 8q24.21  | 122.6–129.7         | 4e-8    | 26                         | <i>MYC</i>                                     |
| 7               | 10q22.2  | 75.0–79.7           | 0.07    | 16                         |                                                |
| 8               | 12p12.1  | 25.5–27.8           | 0.02    | 12                         | <i>KRAS</i>                                    |
| 9               | 17q12    | 36.3–49.1           | 0.08    | 26                         | <i>ERBB2</i>                                   |
| 10              | 19q12    | 34.0–35.6           | 4e-7    | 45                         | <i>CCNE1</i>                                   |
| 11              | 20q13.2  | 45.3–57.7           | 2e-3    | 23                         | <i>AURKA</i>                                   |
| <b>Deletion</b> |          |                     |         |                            |                                                |
| 1               | 1p36.32  | 0–19.3              | 0.24    | 10                         | <i>CHD5IPAX7</i>                               |
| 2               | 3p26.2   | 0–3.5               | 0.13    | 4                          | <i>FBXW7</i>                                   |
| 3               | 4q34.3   | 92.1–183.3          | 8e-4    | 8                          |                                                |
| 4               | 6q16.3   | 10.48–10.49         | 0.04    | 9                          |                                                |
| 5               | 7p22.2   | 0–4.2               | 0.12    | 10                         |                                                |
| 6               | 7q33     | 109.2–137.1         | 0.11    | 4                          |                                                |
| 7               | 8p21.2   | 25.1–29.8           | 0.02    | 12                         |                                                |
| 8               | 11q23.3  | 116.5–134.5         | 0.18    | 8                          |                                                |
| 9               | 13q12.3  | 0–27.8              | 0.22    | 6                          |                                                |
| 10              | 15q26.3  | 97.9–100.3          | 0.07    | 10                         |                                                |
| 11              | 16q21    | 58.3–65.1           | 1e-3    | 18                         |                                                |
| 12              | 17p12    | 11.5–12.2           | 0.02    | 8                          |                                                |
| 13              | 22q13.2  | 41.7–44.3           | 0.18    | 10                         |                                                |

\*Mb coordinates using hg16 build.

<sup>†</sup>Frequency of amplification or deletion to any level. High-level amplifications were seen for *LMYC*, *PIK3CA*, *EGFR*, *6p21.2*, *EGFR*, *CCNE1* (1 case each), and *MYC* (2 cases).

**Table S5. Correlations between amplifications and recurrence-free survival**

| Cytoband | Oncogene in Region | Number of Amplified Samples (and Recurrences)* | Mean Survival Among Amplified Samples <sup>†</sup> | Mean Survival Among Unamplified Samples <sup>†</sup> | Bonferroni-Corrected P-Value <sup>‡</sup> |
|----------|--------------------|------------------------------------------------|----------------------------------------------------|------------------------------------------------------|-------------------------------------------|
| 1p34.3   |                    | 25 (5)                                         | 4.2                                                | 4.7                                                  | 1.0                                       |
| 1q42.13  | <i>LMYC</i>        | 33 (8)                                         | 4.2                                                | 4.9                                                  | 0.9                                       |
| 3q26.32  | <i>PIK3CA</i>      | 9 (4)                                          | 2.4                                                | 4.8                                                  | 0.03                                      |
| 6p21.2   |                    | 8 (3)                                          | 2.6                                                | 4.7                                                  | 0.4                                       |
| 7p11.2   | <i>EGFR</i>        | 8 (2)                                          | 3.7                                                | 4.6                                                  | 1.0                                       |
| 8q24.21  | <i>MYC</i>         | 16 (4)                                         | 4.0                                                | 4.7                                                  | 1.0                                       |
| 10q22.2  |                    | 10 (4)                                         | 3.0                                                | 4.8                                                  | 0.6                                       |
| 12p12.1  | <i>KRAS</i>        | 7 (4)                                          | 2.4                                                | 4.9                                                  | 0.01                                      |
| 17q12    | <i>ERBB2</i>       | 16 (4)                                         | 4.2                                                | 4.7                                                  | 1.0                                       |
| 19q12    | <i>CCNE1</i>       | 29 (6)                                         | 4.3                                                | 4.7                                                  | 1.0                                       |
| 20q13.2  | <i>AURKA</i>       | 14 (5)                                         | 3.3                                                | 4.8                                                  | 0.4                                       |

\*Number of samples amplified to any degree among the 68 completely resected tumors with follow-up clinical data, with number of recurrences among amplified samples (of 13 recurrences overall) in parentheses.

<sup>†</sup>In years after primary surgery.

<sup>‡</sup>By log-rank test, after Bonferroni correction for 11 hypotheses.

**Table S6. Immunohistochemical Stathmin (STMN1) expression in a population-based series of endometrial carcinomas: correlation with clinical phenotype**

| Characteristic                                | Stathmin Negative | Stathmin Positive | P-value <sup>†</sup> |
|-----------------------------------------------|-------------------|-------------------|----------------------|
| Original tumor series*                        | <i>n</i> = 53     | <i>n</i> = 19     |                      |
| FIGO stage III or IV                          | 13%               | 11%               | n.s.                 |
| Non-endometrioid histology                    | 9%                | 21%               | 0.19                 |
| Histologic grade 3                            | 17%               | 47%               | 0.01                 |
| Depth of myometrial infiltration <sup>‡</sup> | 6.5               | 7.5               | n.s.                 |
| Mitotic rate <sup>‡</sup>                     | 7                 | 18                | 0.01                 |
| Loss of ER                                    | 25%               | 32%               | n.s.                 |
| Loss of PR                                    | 19%               | 53%               | 0.005                |
| Presence of necrosis                          | 50%               | 77%               | 0.06                 |
| Vascular invasion                             | 33%               | 65%               | 0.02                 |
| Type II tumor <sup>§</sup>                    | 26%               | 58%               | 0.01                 |
| Aggressive cluster <sup>¶</sup>               | 44%               | 75%               | 0.03                 |
| Validation series*                            | <i>n</i> = 175    | <i>n</i> = 66     |                      |
| FIGO stage III or IV                          | 17%               | 21%               | n.s.                 |
| Non-endometrioid histology                    | 9%                | 15%               | 0.18                 |
| Histologic grade 3                            | 14%               | 32%               | 0.001                |
| Depth of myometrial infiltration <sup>‡</sup> | 4                 | 7                 | 0.003                |
| Mitotic rate <sup>‡</sup>                     | 8                 | 14                | < 0.001              |
| Loss of estrogen receptor                     | 18%               | 45%               | < 0.001              |
| Loss of progesterone receptor                 | 23%               | 48%               | < 0.001              |
| Presence of necrosis                          | 52%               | 77%               | < 0.001              |
| Vascular invasion                             | 34%               | 62%               | < 0.001              |
| Type II tumor <sup>§</sup>                    | 35%               | 64%               | < 0.001              |

\*In the original tumor series, data are missing in 3 cases for histologic grade, depth of myometrial infiltration, mitotic rate, necrosis and vascular invasion, and for cluster annotation in 19 cases. In the validation series, data are missing in 1 case for FIGO stage, in 6 cases for estrogen receptor/progesterone receptor status, in 38 cases for depth of myometrial infiltration, and in 7 cases for type I/II classification.

<sup>†</sup>Using a Pearson chi-square test when otherwise not specified.

<sup>‡</sup>Median depth of myometrial infiltration in millimeters, number of mitotic figures per 10 fields at magnification 40 × , Mann-Whitney U test.

<sup>§</sup>Defined as either non-endometrioid, high-grade endometrioid, or lacking both estrogen receptor and progesterone receptor.

<sup>¶</sup>*N* = 53 cases, 1-sided test.

Ns = not significant.

**Table S7. Immunohistochemical Stathmin (STMN1) expression in a population-based series of endometrial carcinomas: multivariate survival analysis of clinicopathologic variables**

| Characteristic     | Hazard Ratio*        | P-value† |
|--------------------|----------------------|----------|
| Age‡               | 1.048 (1.024–1.072)  | < 0.001  |
| FIGO stage         |                      |          |
| I                  | 1                    | < 0.001  |
| II                 | 3.04 (1.36–6.77)     |          |
| III                | 10.65 (5.87–19.31)   |          |
| IV                 | 48.74 (20.74–114.57) |          |
| Histologic subtype |                      |          |
| Endometrioid       | 1                    | 0.2      |
| Non-endometrioid   | 1.59 (0.79–3.23)     |          |
| Histologic grade   |                      |          |
| 1                  | 1                    | 0.38     |
| 2                  | 1.73 (0.75–3.96)     |          |
| 3                  | 1.36 (0.50–3.76)     |          |
| STMN1 staining     |                      |          |
| Negative           | 1                    | 0.004    |
| Positive           | 2.14 (1.28–3.59)     |          |

\*Hazard ratio with 95% confidence intervals in parentheses, based on the Cox proportional hazards model.

†Using a log-ratio test.

‡Continuous variable with hazard ratio given per year.
